# Supplementary material for: “Living on the edge”Fine-scale observations reveal distinct frontal phytoplankton communities
Source: Research Square preprint supplement (doi:10.21203/rs.3.rs-6412120/v1), 2025-05-22
Supplement: Supplementary file 1 [file 57cd0cfa63eefe2cdf2e8ffc.pdf]

## 768 Supplementary information

### 769 A - Physical description of the study area

#### 770 1 - Satellite images

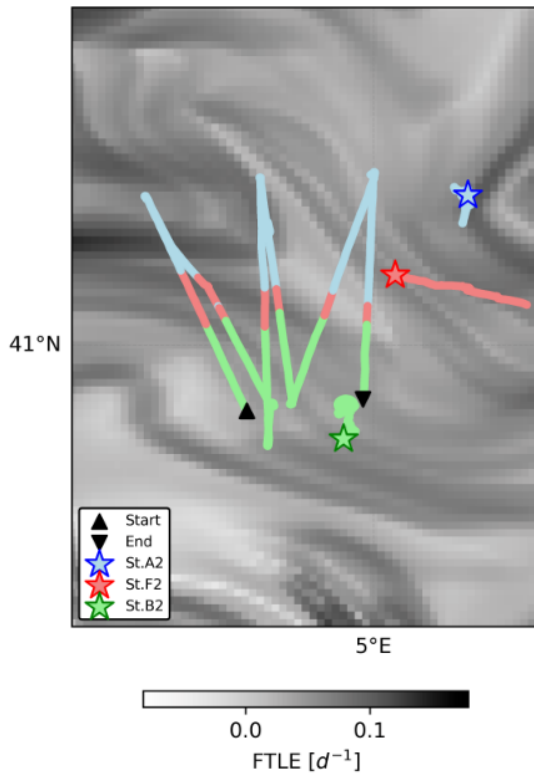

771

772 **Fig. A1.** “Before SWOT” satellite characterization of the frontal region. Resulting map of the  
773 cross-front transect regions from the GMM method, colored as in Fig. 2, overlaid on DUACS 2023  
774 FTLEs [ $d^{-1}$ ]. At the scale of the front identified during BioSWOT-Med (~10 km), DUACS Lagrangian  
775 products lack sufficient resolution to effectively identify it, while it is clearly possible with the FLTE  
776 product including SWOT data (Fig. 2b,c). The three stations are also shown (star positions indicate  
777 the beginning of stations).

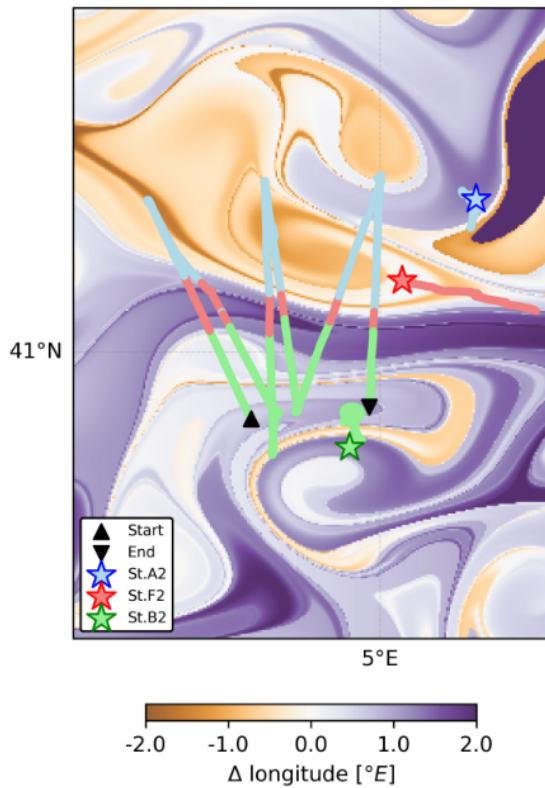

778

779 **Fig. A2.** Satellite characterization of the frontal region. Resulting map of the cross-front transect  
 780 regions from the GMM method, colored according to the salinity criterion and stations (Fig. 2),  
 781 overlaid on SWOT backward-advected longitude [ $^{\circ}$ E], for 15 days starting from April 29 (first day of  
 782 the cross-front transect). A positive value indicates eastward transport of the fluid (purple), while a  
 783 negative value represents westward transport (orange). The three stations are also shown (star  
 784 positions indicate the beginning of stations). The red section of the cross-front transect (F) aligns  
 785 well with the frontal region highlighted by the advected longitude in purple. Note that the F2 station  
 786 appears in the orange region on this map due to the temporal dynamics of the front. This reflects  
 787 the difference between the period of the cross-transect (April 29–30), represented by this map, and  
 788 the period when the stations were sampled (May 5, 6, and 7), during which the front had shifted  
 789 slightly northward (see Fig. A3).

790

791

792

793

794

795

796

797

798

## 799 2 - Drifter data for front tracking

800 Drifters are Lagrangian oceanographic instruments freely advected by sea currents, designed to  
801 float at a specific depth and regularly transmitting their GPS position, therefore giving a direct  
802 measurement of passive transport driven by ocean dynamics.

803 During BioSWOT-Med, surface drifters drogued within the 1 m depth<sup>1,2</sup> were deployed within distinct  
804 water masses, identified through satellite products and TSG transects, in order to provide guidance  
805 for the adaptive sampling strategy of the cruise. Here we focus on the drifters deployed within the  
806 front, therefore supporting the localization of region F and station F2, and consequently the  
807 sampling of the surrounding water masses.

808 Figure A3 highlights the presence of the front by following the advection of drifters deployed in April  
809 23-26, (first experimental phase, 5 westernmost drifters). During the cross-front transect (29-30 April)  
810 and stations A2 (7 May), F2 (6 May) and B2 (5 May) we released additional drifters to track the  
811 water mass advection path and keep the vessel on target (second experimental phase, 7  
812 easternmost drifters).

813 The surface drifters deployed along the front in the two experimental phases, have been selected to  
814 characterize the sea current speed which shows local peaks up to 70 cm/s, and an average speed  
815 of 30 cm/s (Fig. A3) with flow convergence and strain rate up to  $-f$  and  $2f$  respectively, where  $f$  is the  
816 local Coriolis parameter. There is a general continuity and agreement of the drifter trajectories  
817 deployed in the two phases, covering continuous areas, providing also information on the scale of  
818 the frontal structure.

819 (1) Davis RE. Drifter observations of coastal surface currents during CODE: The method and  
820 descriptive view. *Journal of Geophysical Research: Oceans*. 1985 May 20;90(C3):4741-55.  
821 <https://doi.org/10.1029/JC090iC03p04741>.

822 (2) Novelli G, Guigand CM, Cousin C, Ryan EH, Laxague NJ, Dai H, Haus BK, Özgökmen TM. A  
823 biodegradable surface drifter for ocean sampling on a massive scale. *Journal of Atmospheric and*  
824 *Oceanic Technology*. 2017 Nov;34(11):2509-32. <https://doi.org/10.1175/JTECH-D-17-0055.1>.

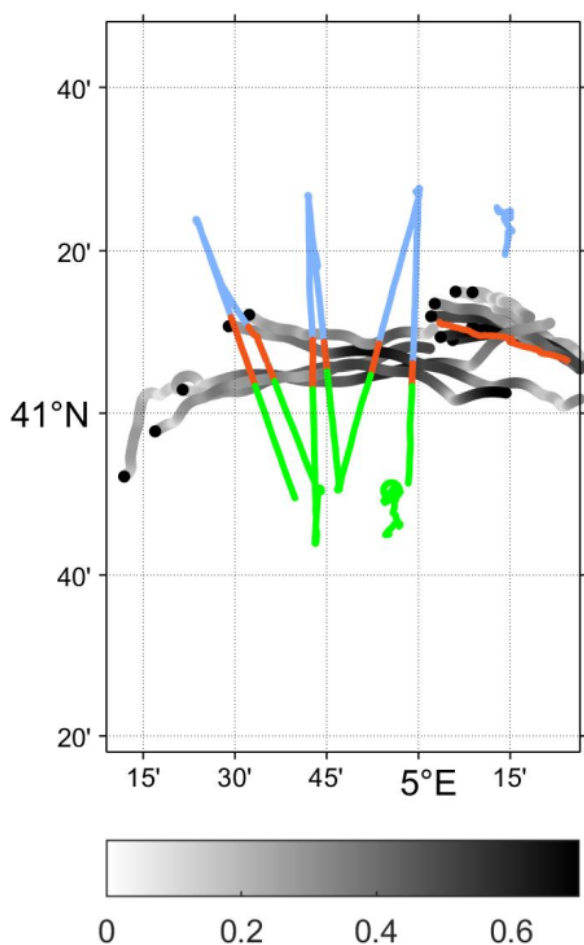

825

826 **Fig. A3.** *In situ* characterization of the frontal region. Surface drifter trajectories deployed along the  
 827 front, for the period April 23 - May 7, 2023. Black dots indicate deployment positions, while the gray  
 828 colorbar indicates the speed (m/s) of drifters advected by the front. Superimposed are the  
 829 cross-front transects and water mass stations colored as in Fig. 2.

830

831

832

833

834

835

836

837

838

839

840 **B - Phytoplankton community**

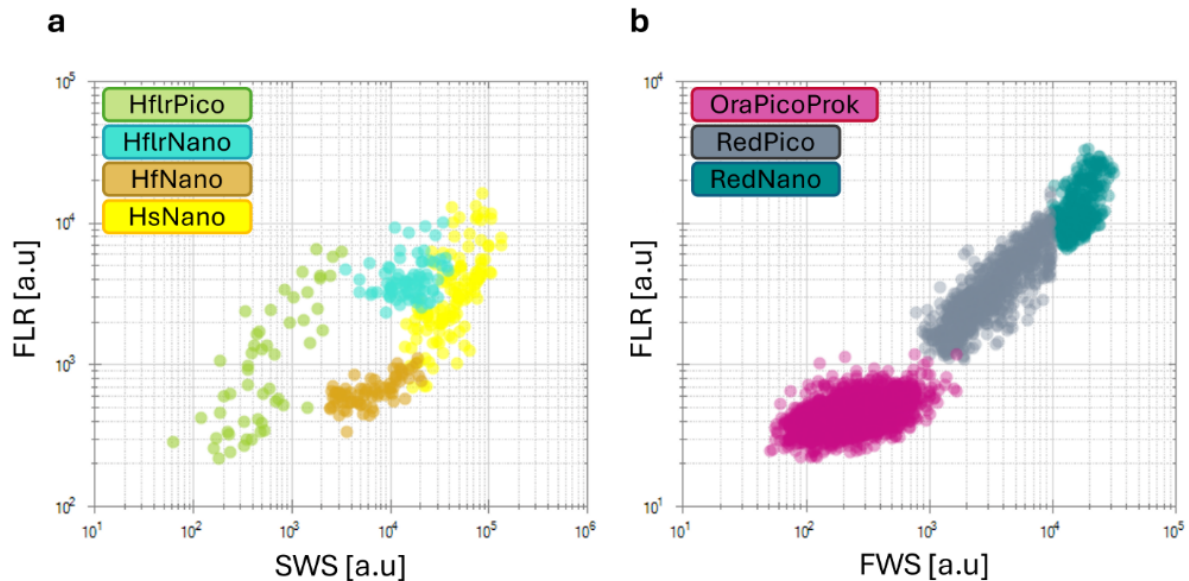

841

842 **Fig. B1.** Cytograms of the seven phytoplankton groups identified by flow cytometry during  
843 BioSWOT-Med. These groups were distinguished through an analysis of various cytograms  
844 combining four key signals: fluorescence (red and orange) and scattering (forward and sideward)  
845 [arbitrary units, a.u.]. Here, two examples of cytograms are presented. In both cases, the y-axis  
846 represents the total red fluorescence (FLR) signal recorded for each cell. The x-axis of **a** represents  
847 the total sideward scatter signal (SWS), while in **b** it corresponds to the forward scatter signal  
848 (FWS).

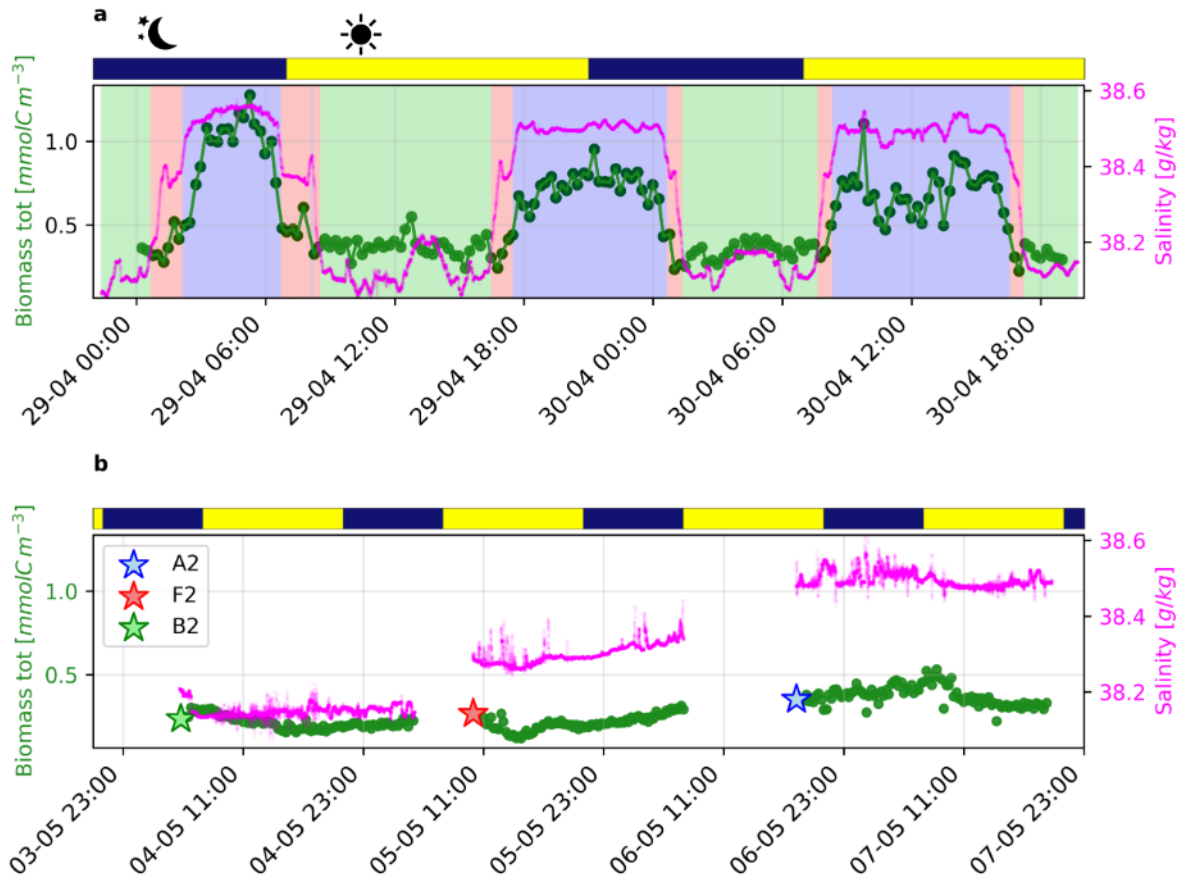

849

850 **Fig. B2.** Time series of total cytometric biomass (green) and absolute salinity (pink). **a** Cross-front  
 851 transect. The background color gradient represents the three regions (A in blue, F in red and B in  
 852 green) identified based on the salinity criterion (Fig. 2). Note the salinity signature, characterized by  
 853 a short-lived plateau around 38.4  $\text{g/kg}$  within F. **b** Station A2, F2, B2 (star positions indicate the  
 854 beginning of stations). The color bar above panels (a) and (b) indicates the diurnal cycle, with  
 855 daytime shown in yellow and nighttime in blue.

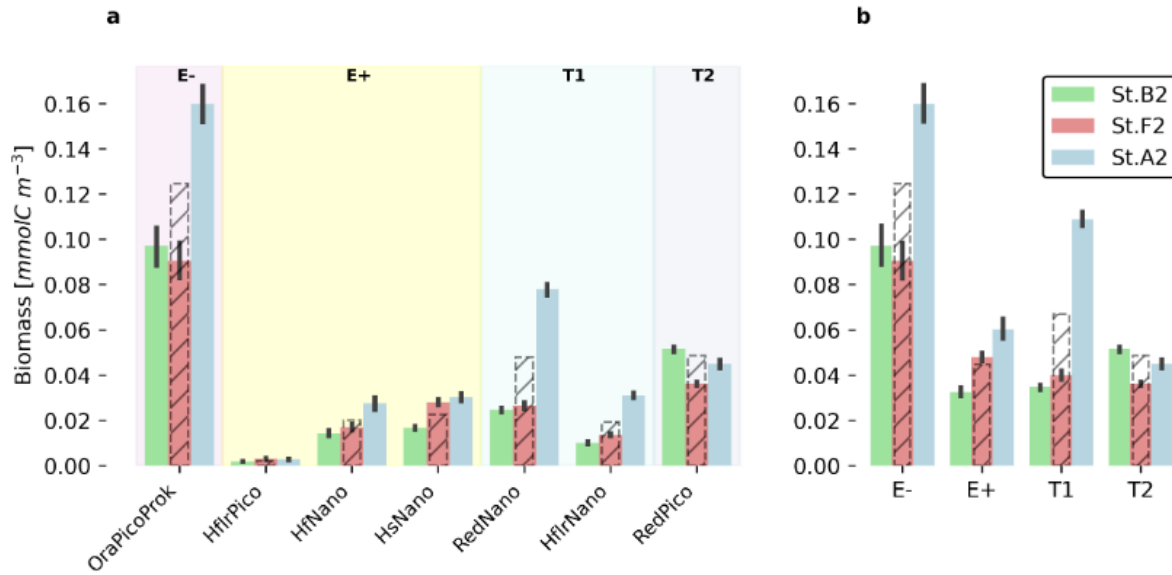

856

857 **Fig. B3.** Phytoplankton biomass. **a** Mean biomass of each cytotmetric phytoplankton group in A2,  
 858 F2, and B2. **b** Mean biomass of transient (T) and edge (E) groups in A2, F2, and B2. The grey  
 859 hatched bars represent the biomass resulting from a conservative mixing of A2 and B2 biomass.

860 This was calculated using the salinity-based mixing ratio ( $\alpha$ ) within F2:  $\alpha = \frac{S_{F2} - S_{B2}}{S_{A2} - S_{B2}}$ ; where S is the

861 mean salinity within stations A2, F2 and B2.  $\alpha$  is equal to 0.44, indicating a nearly 1:1 mixing. When  
 862 the hatched bar is higher than the F2 bar, it indicates a lower observed biomass than would have  
 863 resulted from conservative mixing. This suggests that E-, T1, T2 are negatively affected by frontal  
 864 conditions (due to e.g., increased grazing or subduction/dilution). Conversely, E+ are close to mixed  
 865 A2/B2 biomass. Overall, our results indicate that E+ taxa are the “winners” at the front; not by  
 866 reaching biomass maxima, but by not being disadvantaged by frontal conditions.

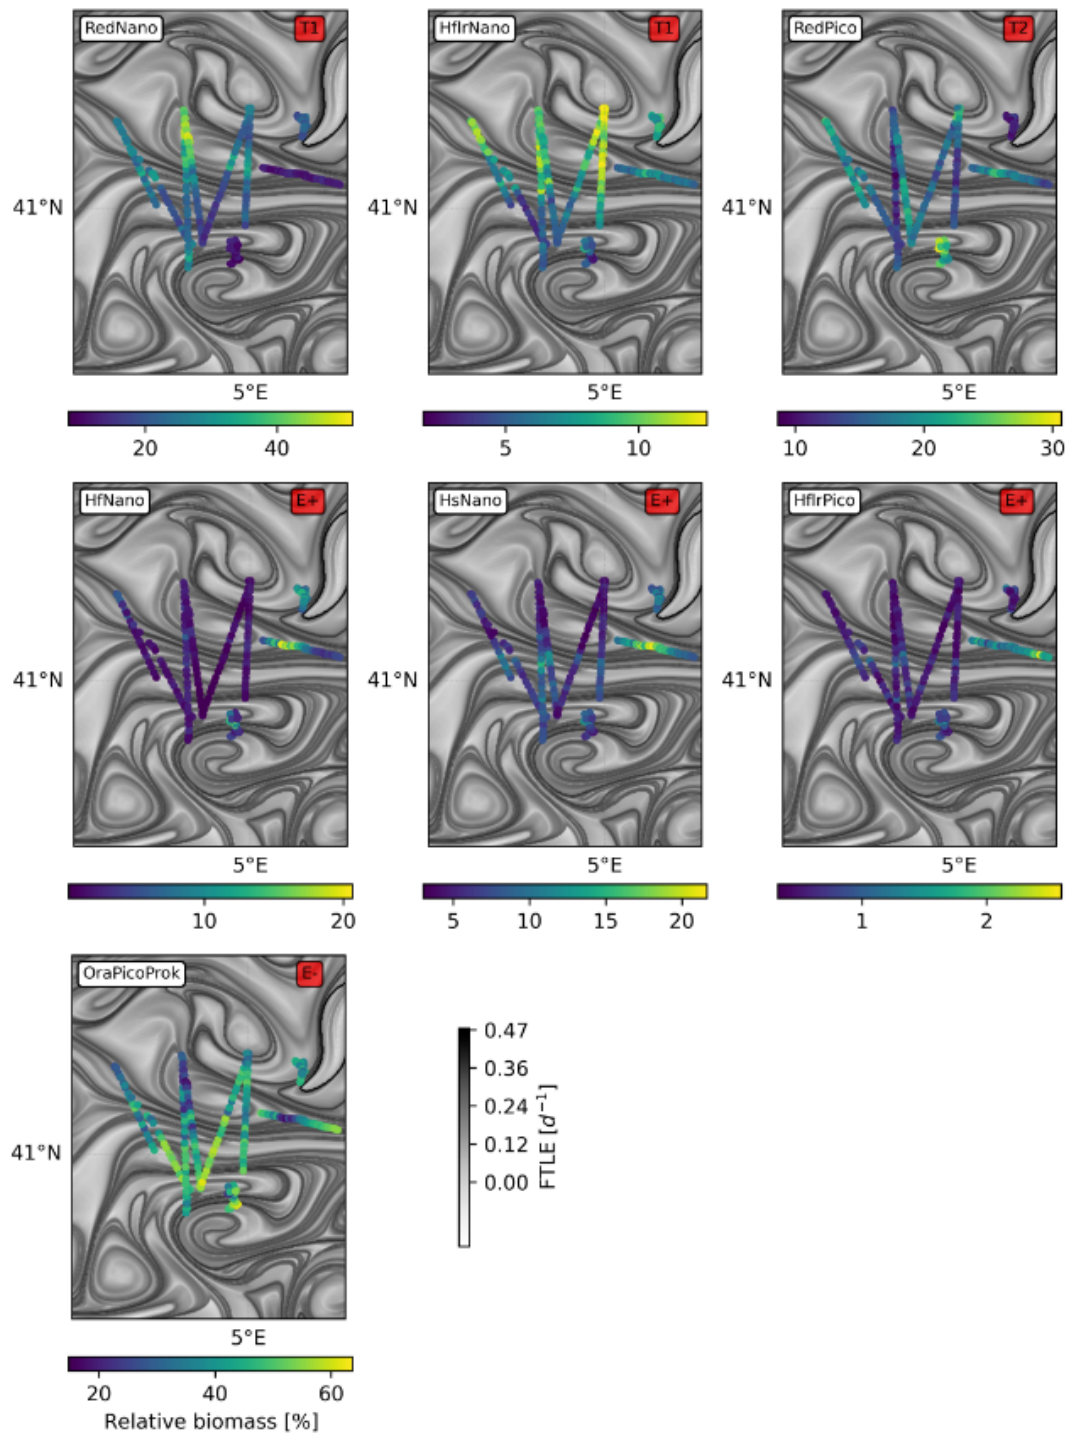

867

868 **Fig. B4.** Phytoplankton community distribution. Biomass percentages along the cross-front transect  
 869 and at stations of each phytoplankton group, overlaid on SWOT FTLEs [ $\text{d}^{-1}$ ] on April 29. The red  
 870 box indicates the type of phytoplankton (E+, E-, T1 or T2) relative to the precedent analysis (cf. Fig.  
 871 3 and B3).
